# Supplementary material
Source: PubMed Central journal article supplement (PMC4598398)
Supplement: IAI.00656-15_zii999091436so1.pdf [file IAI.00656-15_zii999091436so1.pdf]

# 1 Supplemental Material

## 2 Supplemental Materials and Methods

3 **Bacterial strains and growth conditions.** The strains used in this study are listed in  
4 Table S1 (Supplemental Material). MGAS10870 is a serotype M3 GAS strain isolated in  
5 2002 from an individual with a soft tissue infection in Ontario, CA (1). The genome of  
6 strain MGAS10870 has been sequenced (1). MGAS23412 was isolated from an  
7 individual with GAS pharyngitis and MGAS23431 was isolated from the same individual  
8 63 days later during asymptomatic carriage (2). The genomes of MGAS23412 and  
9 MGAS23431 have been sequenced (3). GAS strains were grown on trypticase soy agar  
10 containing 5% sheep blood (SBA) (Becton-Dickinson), in Todd-Hewitt broth containing  
11 0.2% (wt/vol) yeast extract (THY) (Difco Laboratories), or on THY agar. All strains were  
12 grown at 37°C supplemented with 5% CO<sub>2</sub> unless otherwise indicated. When needed,  
13 media were supplemented with chloramphenicol (Sigma-Aldrich) at 10 µg/mL or  
14 spectinomycin (Sigma-Aldrich) at 150 µg/mL. Cloning experiments used *E. coli* DH5α or  
15 TOP10 (Invitrogen) grown in Luria-Bertani (LB) broth or on LB agar (Difco Laboratories)  
16 supplemented with ampicillin (Sigma-Aldrich) at 100 µg/mL or chloramphenicol 20  
17 µg/mL when appropriate.

18  
19 **Generation of isoallelic mutants in MGAS10870 and MGAS23431.** Plasmids and  
20 primers used in this study are listed in Table S2 (Supplemental Material). We used a  
21 previously described procedure for generating the mutant MGAS10870*liaS*<sup>R135G</sup> (3, 4).  
22 Briefly, the *liaS*<sup>R135G</sup> allele from MGAS23431 (carrier strain) was amplified with primer  
23 pair 2307R and 2306F and subsequently ligated into the *E. coli*-Gram positive shuttle

24 vector pJL1055 (5, 6) using *Bam*HI and *Xho*I to generate pJSF38. Electrocompetent  
25 cells of MGAS10870 were transformed with pJSF38 and allelic replacement carried out  
26 as previously described (4, 5). Likewise, the mutant MGAS23431/*lia*S<sup>WT</sup> was generated  
27 using the same primers to amplify *lia*S<sup>WT</sup> from MGAS10870 and ligated into pJL1055  
28 using the same restriction enzymes to generate pJSF39. Electrocompetent cells of  
29 MGAS23431 were transformed with pJSF39 and allelic replacement carried out as  
30 previously described (3, 4). All mutants were confirmed using Sanger sequencing  
31 (Applied Biosystems).

32

33 **Cultured human epithelial cell adherence assays.** Adherence to cultured human  
34 epithelial cells was carried out as previously described (3). HaCaT cells were seeded at  
35 a density of  $6 \times 10^5$  in 2 mL high glucose DMEM with L-glutamine and 10% FBS in a 12-  
36 well plate. Cells were incubated overnight at 38.5°C. The appropriate GAS strains were  
37 grown to mid-exponential phase ( $OD_{600} \approx 0.5$ ) in THY, pelleted, washed once with  
38 sterile PBS, and suspended in an equal volume PBS. Approximately  $1 \times 10^7$  CFU GAS  
39 (MOI  $\approx 10$ ) were added to 8 replicate wells, rocked briefly, and incubated for 2 hours at  
40 37°C. Wells were subsequently washed with PBS (2 x 1 mL, 2 x 2 mL) and incubated at  
41 37°C with 1 mL PBS containing 1% saponin (Oxoid). Cells were released from wells by  
42 pipetting, serially diluted, and plated on SBA to enumerate GAS. Percent adherence  
43 was calculated by dividing recovered CFU by the original inoculum.

44

45 ***Ex vivo* bactericidal assays in human blood.** Growth in whole human blood was  
46 conducted under a Houston Methodist Research Institute Institutional Review Board

47 experimental protocol and performed as described by Lancefield (8). A minimum of two,  
48 healthy, non-immune adult donors were used for each experiment. Bacteria were grown  
49 to mid-exponential phase ( $OD_{600} \approx 0.5$ ) in THY, pelleted, and suspended in an equal  
50 volume of phosphate-buffered saline (PBS). Approximately 100 CFU of each GAS strain  
51 was used to inoculate 300  $\mu$ l of fresh human blood in quadruplicate. Samples were  
52 incubated at 37°C with 5% CO<sub>2</sub> with gentle rotation for 3 hours, serially diluted in PBS,  
53 and subsequently plated on SBA. Multiplication factors were calculated by dividing the  
54 number of CFU/mL after 3 h incubation by the initial inoculum.

55

56 **RNA isolation and quantitative real-time PCR analysis.** GAS strains were grown  
57 overnight THY, diluted 1:50 in fresh THY, and incubated. Samples were taken at  
58 defined time points for determination of  $OD_{600}$  and RNA isolation. RNA was isolated and  
59 purified with an RNeasy Mini Kit (Qiagen) as previously described (4). Quantity and  
60 quality of RNA was determined using an Agilent 2100 Bioanalyzer and RNA 6000 Nano  
61 Kit (Agilent Technologies).

62 TaqMan (Life Technologies) quantitative real-time PCR (qRT-PCR) on cDNA  
63 produced using SuperScript III (Invitrogen) was performed with an ABI7500 Fast Real-  
64 Time system. TaqMan primers and probes used in analyses are listed in Table S2  
65 (Supplemental Material). The endogenous control gene *tufA* was used for all TaqMan  
66 analyses. Transcript levels were compared between strains using the  $\Delta\Delta C_T$  method  
67 (user bulletin no. 2, ABI Prism 7700 Sequence Detection System; Life Technologies).  
68 All reactions were performed in triplicate using RNA purified from at least three biologic  
69 replicates.

70

## 71 Supplemental References

- 72 1. **Beres, S. B., R. K. Carroll, P. R. Shea, I. Sitkiewicz, J. C. Martinez-Gutierrez,**  
73 **D. E. Low, A. McGeer, B. M. Willey, K. Green, G. J. Tyrrell, T. D. Goldman, M.**  
74 **Feldgarden, B. W. Birren, Y. Fofanov, J. Boos, W. D. Wheaton, C. Honisch,**  
75 **and J. M. Musser.** 2010. Molecular complexity of successive bacterial epidemics  
76 deconvoluted by comparative pathogenomics. *Proc Natl Acad Sci U S A.*  
77 **107:4371-6.**
- 78 2. **Johnson, D. R., R. Kurlan, J. Leckman, and E. L. Kaplan.** 2010. The human  
79 immune response to streptococcal extracellular antigens: clinical, diagnostic, and  
80 potential pathogenetic implications. *Clin Infect Dis.* **50:481-90.**
- 81 3. **Flores, A. R., B. E. Jewell, R. J. Olsen, S. A. Shelburne, 3rd, N. Fittipaldi, S.**  
82 **B. Beres, and J. M. Musser.** 2014. Asymptomatic carriage of group A  
83 *Streptococcus* is associated with elimination of capsule production. *Infect Immun.*  
84 **82:3958-67.**
- 85 4. **Flores, A. R., R. J. Olsen, A. Wunsche, M. Kumaraswami, S. A. Shelburne,**  
86 **3rd, R. K. Carroll, and J. M. Musser.** 2013. Natural variation in the promoter of  
87 the gene encoding the Mga regulator alters host-pathogen interactions in group A  
88 *Streptococcus* carrier strains. *Infect Immun.* **81:4128-4138.**
- 89 5. **Gryllos, I., R. Grifantini, A. Colaprico, M. E. Cary, A. Hakansson, D. W.**  
90 **Carey, M. Suarez-Chavez, L. A. Kalish, P. D. Mitchell, G. L. White, and M. R.**  
91 **Wessels.** 2008. PerR confers phagocytic killing resistance and allows  
92 pharyngeal colonization by group A *Streptococcus*. *PLoS Pathog.* **4:e1000145.**

- 93 6. **Li, J., D. L. Kasper, F. M. Ausubel, B. Rosner, and J. L. Michel.** 1997.  
94 Inactivation of the alpha C protein antigen gene, *bca*, by a novel shuttle/suicide  
95 vector results in attenuation of virulence and immunity in group B *Streptococcus*.  
96 *Proc Natl Acad Sci U S A.* **94**:13251-6.
- 97 7. **Lukomski, S., N. P. Hoe, I. Abdi, J. Rurangirwa, P. Kordari, M. Liu, S. J. Dou,**  
98 **G. G. Adams, and J. M. Musser.** 2000. Nonpolar inactivation of the  
99 hypervariable streptococcal inhibitor of complement gene (*sic*) in serotype M1  
100 *Streptococcus pyogenes* significantly decreases mouse mucosal colonization.  
101 *Infect Immun.* **68**:535-42.
- 102 8. **Lancefield, R. C.** 1959. Persistence of type-specific antibodies in man following  
103 infection with group A streptococci. *J Exp Med.* **110**:271-92.

104

105

106

107 **Supplemental Figures**

108 **Figure S1.**

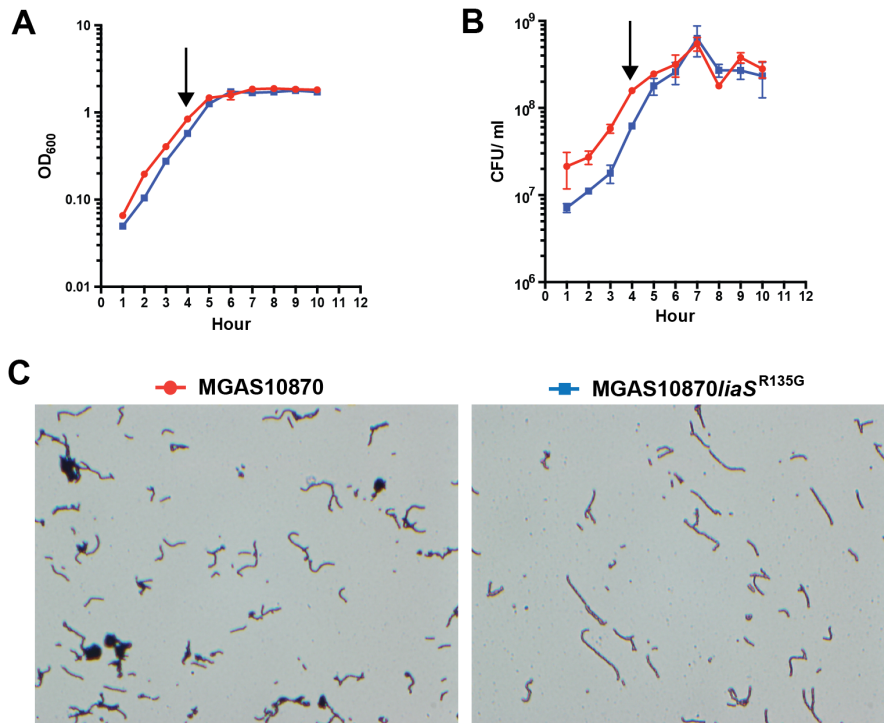

109

110 **Figure S1. Strain lacking LiaS has altered growth *in vitro*.** Growth curve as  
111 measured by optical density at 600 nm (OD<sub>600</sub>) (A) or colony forming units (CFU) (B) in  
112 a rich medium (THY) for MGAS10870 (wild-type, red) and MGAS10870/liaS<sup>R135G</sup>  
113 (carrier, blue). Black arrow indicates time point at which samples were taken for Gram's  
114 stain and microscopy. Error bars represent standard error of the mean. (C) Gram's  
115 stain and light microscopy of strains during growth in A and B. Original magnification  
116 400x.

117

118 **Supplemental Tables**

119 **Table S1. Strains used in this study.**

| Strain                                  | Description                                                                                                                    | Reference  |
|-----------------------------------------|--------------------------------------------------------------------------------------------------------------------------------|------------|
| MGAS10870                               | Wild-type invasive serotype M3 GAS strain.                                                                                     | (1)        |
| MGAS10870/ <i>liaS</i> <sup>R135G</sup> | Isoallelic mutant of MGAS10870 in which the carrier <i>liaS</i> <sup>R135G</sup> replaced the <i>liaS</i> <sup>WT</sup> allele | This study |
| MGAS23412                               | Serotype M3 GAS pharyngitis strain isolated at Day 0                                                                           | (3)        |
| MGAS23431                               | Serotype M3 GAS carrier strain isolated at Day 63 from same patient as MGAS23412                                               | (3)        |
| MGAS23431/ <i>liaS</i> <sup>WT</sup>    | Isoallelic mutant of MGAS23431 in which <i>liaS</i> <sup>R135G</sup> was replaced with <i>liaS</i> <sup>WT</sup>               | This study |

120

121 **Table S2. Plasmids and primers used in this study.**

| Plasmid | Description                                                               | Reference/Source |
|---------|---------------------------------------------------------------------------|------------------|
| pCR2.1  | General purpose cloning vector                                            | Invitrogen       |
| pJL1055 | Temperature sensitive <i>E. coli</i> /GAS shuttle vector                  | D. Kasper        |
| pJSF38  | pJL1055 containing the <i>liaS</i> <sup>R135G</sup> allele from MGAS23431 | This study       |
| pJSF39  | pJL1055 containing the <i>liaS</i> <sup>WT</sup> allele from MGAS10870    | This study       |
| Primer  | Sequence (5'-3')                                                          | Use              |
| 2305F   | TCTTGTGGAACACCGTACCG                                                      | PCR              |

|        |                                     |                    |
|--------|-------------------------------------|--------------------|
| 2306F  | AAATTCAGCCGCACTCGAT                 | PCR                |
| 2307R  | CTTTAGATGTTAGTTCATA                 | PCR                |
| 2309R  | TAGTTATGCAGATGCAGTCA                | PCR                |
| MSP191 | GCCTCAACACCGCCTAACTCTGG             | <i>liaR</i> TaqMan |
| MSP192 | 6FAM-TCTGGCTTCAAAGCCAATGCCA-BHQ1    | <i>liaR</i> TaqMan |
| MSP193 | GGCCTCTAATGGACGTGAAGGGG             | <i>liaR</i> TaqMan |
| MSP194 | ACTTCAATTCGACTAGCTTTAGCA            | <i>liaS</i> TaqMan |
| MSP195 | 6FAM-ACGTGTTGCTAATGAATTCTGGGCA-BHQ1 | <i>liaS</i> TaqMan |
| MSP196 | GGAAACCATTGCTCAGCTTCC               | <i>liaS</i> TaqMan |
| MSP197 | AGGGATTGGTTATCCGTTTCTTT             | <i>liaF</i> TaqMan |
| MSP198 | 6FAM-CGTTGCGCAAATCATATTGCTGACA-BHQ1 | <i>liaF</i> TaqMan |
| MSP199 | TCCATATACGGAAGCGTTGATT              | <i>liaF</i> TaqMan |

122

123

124 **Table S3.** Differentially expressed genes in MGAS10870/*liaS*<sup>R135G</sup> compared to

125 MGAS10870 in mid-exponential phase growth.

| Locus tag <sup>1</sup> | Gene Name   | Fold-change | P-value <sup>2</sup> |
|------------------------|-------------|-------------|----------------------|
| SpyM3_0029             | -           | 1.8         | 8.9E-03              |
| SpyM3_0036             | <i>adh2</i> | -2.0        | 1.1E-03              |
| SpyM3_0037             | <i>adh1</i> | 2.0         | 6.3E-04              |
| SpyM3_0068             | -           | 4.7         | 4.4E-23              |
| <b>SpyM3_0077</b>      | -           | 3.0         | 4.8E-11              |
| SpyM3_0089             | <i>pepA</i> | 2.1         | 8.9E-05              |



|                   |               |      |          |
|-------------------|---------------|------|----------|
| SpyM3_0105        | -             | -2.0 | 5.7E-05  |
| SpyM3_0123        | -             | -1.8 | 1.7E-02  |
| SpyM3_0124        | -             | -1.8 | 2.1E-03  |
| SpyM3_0132        | -             | -2.0 | 1.4E-04  |
| SpyM3_0133        | <i>metB</i>   | 2.2  | 1.1E-02  |
| SpyM3_0152        | -             | -1.8 | 1.6E-03  |
| SpyM3_0160        | <i>hasC.2</i> | -2.3 | 6.2E-09  |
| SpyM3_0161        | <i>gpsA</i>   | -1.9 | 9.7E-05  |
| SpyM3_0235        | <i>atmE</i>   | 1.9  | 1.6E-02  |
| SpyM3_0243        | -             | 1.9  | 1.6E-04  |
| SpyM3_0305        | -             | 2.2  | 2.0E-06  |
| SpyM3_0306        | -             | -1.9 | 1.8E-04  |
| SpyM3_0307        | -             | 1.9  | 1.9E-04  |
| SpyM3_0334        | -             | -1.9 | 1.0E-02  |
| SpyM3_0346        | <i>mutR</i>   | 2.1  | 2.5E-02  |
| SpyM3_0359        | <i>gloA</i>   | -1.7 | 3.4E-02  |
| SpyM3_0361        | <i>pepQ</i>   | -1.7 | 3.4E-02  |
| <b>SpyM3_0363</b> | -             | -2.4 | 8.3E-10  |
| <b>SpyM3_0364</b> | -             | -2.5 | 5.6E-11  |
| SpyM3_0406        | -             | -2.3 | 5.7E-06  |
| SpyM3_0407        | -             | -2.3 | 1.1E-05  |
| <b>SpyM3_0411</b> | -             | -3.3 | <1.0E-23 |
| SpyM3_0428        | -             | -1.8 | 2.2E-03  |

|                   |               |      |         |
|-------------------|---------------|------|---------|
| SpyM3_0429        | <i>pepF</i>   | -1.9 | 2.8E-04 |
| <b>SpyM3_0438</b> | -             | -1.8 | 1.2E-02 |
| SpyM3_0489        | -             | 1.9  | 8.9E-03 |
| <b>SpyM3_0514</b> | <i>rexA</i>   | -1.8 | 4.0E-03 |
| <b>SpyM3_0534</b> | -             | 1.8  | 4.7E-03 |
| <b>SpyM3_0535</b> | -             | 2.7  | 5.0E-12 |
| <b>SpyM3_0536</b> | -             | 1.9  | 2.7E-04 |
| <b>SpyM3_0541</b> | -             | -1.7 | 4.0E-02 |
| SpyM3_0547        | <i>folC.2</i> | -2.0 | 3.3E-04 |
| <b>SpyM3_0548</b> | -             | -1.9 | 5.3E-04 |
| SpyM3_0575        | -             | 1.7  | 4.5E-02 |
| SpyM3_0581        | -             | -2.2 | 1.8E-05 |
| SpyM3_0630        | -             | 2.1  | 1.5E-06 |
| SpyM3_0655        | -             | 1.9  | 1.9E-03 |
| SpyM3_0656        | -             | 1.8  | 5.6E-03 |
| SpyM3_0821        | <i>gid</i>    | 2.2  | 2.7E-05 |
| SpyM3_0837        | <i>citC</i>   | -2.1 | 2.5E-06 |
| SpyM3_0838        | -             | -2.2 | 8.8E-08 |
| SpyM3_0853        | <i>fhs.1</i>  | 2.4  | 2.0E-06 |
| <b>SpyM3_0871</b> | <i>coaA</i>   | -2.2 | 1.7E-04 |
| <b>SpyM3_0896</b> | -             | 1.8  | 1.8E-03 |
| <b>SpyM3_0897</b> | -             | 2.0  | 1.6E-05 |
| <b>SpyM3_0899</b> | -             | 1.7  | 2.6E-02 |

|                   |               |      |         |
|-------------------|---------------|------|---------|
| SpyM3_0918        | -             | -1.7 | 3.6E-02 |
| SpyM3_0991        | <i>dltD</i>   | -1.8 | 1.5E-03 |
| SpyM3_0992        | <i>dltC</i>   | -1.8 | 2.1E-03 |
| SpyM3_0993        | <i>dltB</i>   | -2.6 | 1.0E-11 |
| SpyM3_0994        | <i>dltA</i>   | -2.0 | 3.1E-05 |
| SpyM3_0995        | -             | -1.8 | 2.0E-03 |
| <b>SpyM3_1048</b> | <i>nrdH</i>   | -1.9 | 7.3E-05 |
| SpyM3_1049        | <i>nrdE.1</i> | -1.9 | 2.8E-04 |
| <b>SpyM3_1050</b> | <i>nrdF</i>   | -1.9 | 2.5E-04 |
| SpyM3_1057        | -             | 1.8  | 3.4E-02 |
| SpyM3_1160        | -             | 2.0  | 1.0E-03 |
| <b>SpyM3_1173</b> | <i>ftsA</i>   | 2.0  | 4.8E-06 |
| SpyM3_1180        | <i>glcK</i>   | 1.9  | 8.6E-04 |
| SpyM3_1181        | -             | 1.9  | 1.5E-04 |
| SpyM3_1268        | -             | -2.0 | 1.1E-04 |
| SpyM3_1269        | <i>ccdA</i>   | -2.1 | 2.7E-06 |
| SpyM3_1270        | -             | -1.8 | 4.5E-03 |
| SpyM3_1272        | -             | -2.0 | 7.4E-05 |
| <b>SpyM3_1299</b> | -             | 2.1  | 2.9E-02 |
| <b>SpyM3_1363</b> | <i>cysM</i>   | 1.7  | 7.6E-03 |
| SpyM3_1409        | <i>sdn</i>    | 2.7  | 2.8E-12 |
| SpyM3_1459        | -             | -2.1 | 1.5E-05 |
| <b>SpyM3_1475</b> | <i>nagA</i>   | 2.5  | 2.2E-06 |

|                   |               |      |         |
|-------------------|---------------|------|---------|
| SpyM3_1504        | <i>hit</i>    | -1.8 | 9.6E-04 |
| SpyM3_1505        | -             | -1.8 | 8.6E-04 |
| <b>SpyM3_1517</b> | <i>accA</i>   | 2.0  | 6.7E-06 |
| SpyM3_1518        | <i>accD</i>   | 1.8  | 3.1E-03 |
| SpyM3_1525        | <i>fabK</i>   | 1.7  | 2.2E-02 |
| SpyM3_1527        | <i>fabH</i>   | 2.2  | 1.9E-08 |
| SpyM3_1528        | -             | 1.7  | 9.9E-03 |
| SpyM3_1537        | -             | 2.4  | 6.6E-06 |
| <b>SpyM3_1566</b> | <i>pmi</i>    | -2.1 | 2.2E-05 |
| <b>SpyM3_1591</b> | -             | -1.8 | 2.3E-03 |
| SpyM3_1601        | <i>norA</i>   | 2.7  | 4.6E-04 |
| SpyM3_1614        | -             | -1.9 | 3.7E-04 |
| <b>SpyM3_1619</b> | -             | -1.8 | 5.3E-03 |
| SpyM3_1657        | <i>lacC.2</i> | 1.7  | 3.2E-02 |
| <b>SpyM3_1666</b> | -             | 3.2  | 1.4E-09 |
| SpyM3_1698        | <i>ska</i>    | -2.4 | 2.8E-09 |
| SpyM3_1699        | -             | -1.9 | 6.4E-03 |
| SpyM3_1712        | <i>pabP</i>   | -2.1 | 5.9E-04 |
| SpyM3_1713        | <i>trpG</i>   | -2.7 | 5.8E-09 |
| SpyM3_1714        | -             | -2.2 | 1.7E-05 |
| <b>SpyM3_1737</b> | -             | 1.8  | 2.0E-03 |
| SpyM3_1738        | -             | -2.0 | 5.7E-04 |
| SpyM3_1740        | <i>prsA</i>   | 1.6  | 4.8E-02 |

|                   |              |      |          |
|-------------------|--------------|------|----------|
| <b>SpyM3_1741</b> | -            | 2.4  | 8.2E-08  |
| <b>SpyM3_1742</b> | <i>speB</i>  | 2.4  | 1.1E-08  |
| SpyM3_1745        | <i>mf</i>    | 1.7  | 8.5E-03  |
| SpyM3_1792        | -            | 1.7  | 1.2E-02  |
| <b>SpyM3_1799</b> | <i>spxA2</i> | -5.4 | <1.0E-23 |
| SpyM3_1812        | -            | 1.7  | 4.5E-02  |
| SpyM3_1835        | <i>dnaC</i>  | 1.7  | 2.1E-02  |
| SpyM3_1841        | <i>sdhB</i>  | -2.0 | 7.2E-06  |
| SpyM3_1842        | <i>sdhA</i>  | -1.9 | 9.3E-04  |
| <b>SpyM3_1843</b> | -            | 2.1  | 1.3E-05  |
| SpyM3_1849        | -            | -1.7 | 3.2E-02  |
| SpyM3_1850        | -            | -1.7 | 3.5E-02  |
| SpyM3_1857        | <i>guaB</i>  | 1.7  | 2.9E-02  |

126

127 <sup>1</sup> Locus tag as defined in the serotype M3 reference genome MGAS315. Bold font  
128 indicates significant differential expression in both growth phases.

129 <sup>2</sup> *P*-value after Bonferonni correction

130

131

132 **Table S4.** Differentially expressed genes in MGAS10870/*iaS*<sup>R135G</sup> compared to  
133 MGAS10870 in early stationary phase growth.

| <b>Locus tag<sup>1</sup></b> | <b>Gene Name</b> | <b>Fold-change</b> | <b><i>P</i>-value<sup>2</sup></b> |
|------------------------------|------------------|--------------------|-----------------------------------|
| SpyM3_0011                   | <i>hpt</i>       | -1.7               | 1.0E-02                           |

|                   |             |      |         |
|-------------------|-------------|------|---------|
| SpyM3_0012        | <i>ftsH</i> | -1.6 | 3.5E-02 |
| SpyM3_0014        | -           | -2.4 | 1.1E-08 |
| SpyM3_0034        | -           | 1.7  | 5.1E-03 |
| <b>SpyM3_0077</b> | -           | 2.7  | 6.7E-11 |
| SpyM3_0086        | <i>ackA</i> | -1.7 | 3.6E-03 |
| SpyM3_0169        | -           | 1.8  | 2.5E-05 |
| SpyM3_0187        | -           | -2.1 | 1.2E-03 |
| SpyM3_0204        | -           | 2.0  | 3.4E-05 |
| SpyM3_0231        | -           | -2.0 | 5.7E-06 |
| SpyM3_0232        | <i>atmA</i> | 2.0  | 1.6E-06 |
| SpyM3_0261        | -           | -1.7 | 2.8E-02 |
| SpyM3_0321        | <i>cypB</i> | 1.7  | 1.9E-02 |
| SpyM3_0332        | -           | 1.8  | 2.2E-04 |
| <b>SpyM3_0363</b> | -           | -1.9 | 1.3E-04 |
| <b>SpyM3_0364</b> | -           | -2.0 | 2.3E-05 |
| SpyM3_0375        | <i>rnc</i>  | -2.3 | 3.7E-05 |
| SpyM3_0376        | <i>smc</i>  | -2.2 | 5.5E-06 |
| <b>SpyM3_0411</b> | -           | -1.9 | 3.0E-05 |
| <b>SpyM3_0438</b> | -           | -1.9 | 2.4E-03 |
| SpyM3_0458        | -           | 1.7  | 1.3E-03 |
| SpyM3_0512        | -           | 2.1  | 9.7E-06 |
| <b>SpyM3_0514</b> | <i>rexA</i> | -1.8 | 1.5E-03 |
| SpyM3_0515        | -           | -2.0 | 3.3E-05 |

|                   |             |      |         |
|-------------------|-------------|------|---------|
| SpyM3_0517        | <i>mscL</i> | 2.4  | 1.3E-11 |
| <b>SpyM3_0534</b> | -           | 1.9  | 1.6E-06 |
| <b>SpyM3_0535</b> | -           | 2.7  | 2.0E-15 |
| <b>SpyM3_0536</b> | -           | 2.3  | 4.0E-11 |
| <b>SpyM3_0541</b> | -           | -1.8 | 1.2E-03 |
| SpyM3_0546        | <i>gor</i>  | 1.8  | 3.9E-03 |
| <b>SpyM3_0548</b> | -           | -2.0 | 4.6E-06 |
| SpyM3_0551        | -           | 1.6  | 3.6E-02 |
| SpyM3_0558        | <i>pyrR</i> | 3.3  | 5.3E-13 |
| SpyM3_0559        | <i>pyrP</i> | 4.3  | 6.4E-22 |
| SpyM3_0560        | <i>pyrB</i> | 4.6  | 3.6E-19 |
| SpyM3_0561        | <i>carA</i> | 5.6  | 1.9E-38 |
| SpyM3_0562        | <i>carB</i> | 6.2  | 2.7E-29 |
| SpyM3_0570        | -           | -1.9 | 9.6E-03 |
| SpyM3_0578        | <i>fruR</i> | 5.4  | 7.0E-32 |
| SpyM3_0579        | <i>fruK</i> | 5.6  | 1.5E-34 |
| SpyM3_0580        | <i>fruA</i> | 3.3  | 4.1E-23 |
| SpyM3_0602        | <i>dyr</i>  | -2.0 | 5.1E-06 |
| SpyM3_0603        | -           | -1.8 | 1.2E-03 |
| SpyM3_0615        | -           | 1.7  | 6.5E-03 |
| SpyM3_0616        | <i>pyrF</i> | 3.8  | 9.4E-13 |
| SpyM3_0617        | <i>pyrE</i> | 5.4  | 5.2E-25 |
| SpyM3_0618        | <i>amiC</i> | 3.6  | 4.8E-19 |

|                   |             |      |         |
|-------------------|-------------|------|---------|
| SpyM3_0619        | -           | 2.8  | 1.8E-14 |
| SpyM3_0620        | -           | 2.9  | 6.1E-15 |
| SpyM3_0657        | -           | 1.8  | 4.6E-04 |
| SpyM3_0739        | <i>csrA</i> | 1.7  | 1.0E-02 |
| SpyM3_0785        | <i>ppnK</i> | -1.9 | 6.4E-04 |
| SpyM3_0813        | -           | 1.9  | 1.2E-06 |
| <b>SpyM3_0871</b> | <i>coaA</i> | -2.1 | 2.3E-03 |
| SpyM3_0886        | <i>mreA</i> | 1.8  | 6.1E-04 |
| SpyM3_0887        | <i>truB</i> | 1.9  | 1.2E-02 |
| SpyM3_0895        | -           | 2.5  | 4.1E-14 |
| <b>SpyM3_0896</b> | -           | 2.3  | 3.3E-11 |
| <b>SpyM3_0897</b> | -           | 2.3  | 8.0E-11 |
| SpyM3_0898        | -           | 2.2  | 1.6E-10 |
| <b>SpyM3_0899</b> | -           | 2.7  | 3.4E-17 |
| SpyM3_0900        | -           | 2.7  | 2.8E-17 |
| SpyM3_0914        | <i>dnaE</i> | 1.9  | 1.3E-04 |
| SpyM3_0980        | <i>glgP</i> | -1.9 | 7.9E-04 |
| SpyM3_0981        | <i>malQ</i> | -2.0 | 3.4E-05 |
| SpyM3_0983        | <i>malE</i> | -2.0 | 5.3E-07 |
| SpyM3_0984        | <i>malF</i> | -2.3 | 2.0E-08 |
| SpyM3_0985        | <i>malG</i> | -2.4 | 1.9E-07 |
| SpyM3_1019        | -           | -1.9 | 2.3E-05 |
| SpyM3_1020        | -           | 2.3  | 1.1E-04 |



|                   |             |      |         |
|-------------------|-------------|------|---------|
| SpyM3_1046        | <i>ptsI</i> | -1.8 | 2.1E-04 |
| SpyM3_1047        | <i>ptsH</i> | -1.6 | 2.2E-02 |
| <b>SpyM3_1048</b> | <i>nrdH</i> | -2.0 | 3.8E-03 |
| <b>SpyM3_1050</b> | <i>nrdF</i> | -1.8 | 3.0E-02 |
| SpyM3_1152        | -           | 1.7  | 1.7E-02 |
| SpyM3_1165        | -           | 1.6  | 2.1E-02 |
| <b>SpyM3_1173</b> | <i>ftsA</i> | 1.6  | 2.1E-02 |
| SpyM3_1198        | <i>argR</i> | -2.1 | 2.0E-06 |
| SpyM3_1294        | <i>hyl</i>  | 1.6  | 1.3E-02 |
| SpyM3_1295        | -           | 1.7  | 1.1E-02 |
| SpyM3_1296        | -           | 1.7  | 7.3E-03 |
| <b>SpyM3_1299</b> | -           | 1.8  | 1.5E-02 |
| SpyM3_1355        | <i>recX</i> | 1.8  | 1.9E-04 |
| <b>SpyM3_1363</b> | <i>cysM</i> | 2.2  | 2.4E-08 |
| SpyM3_1469        | -           | 2.0  | 6.5E-07 |
| <b>SpyM3_1475</b> | <i>nagA</i> | 2.6  | 3.6E-12 |
| SpyM3_1490        | <i>copZ</i> | 2.2  | 2.3E-07 |
| SpyM3_1491        | <i>copA</i> | 2.4  | 1.0E-10 |
| SpyM3_1492        | <i>copY</i> | 1.8  | 1.4E-04 |
| SpyM3_1511        | <i>manL</i> | -1.8 | 2.9E-03 |
| SpyM3_1514        | -           | -1.8 | 3.2E-02 |
| <b>SpyM3_1517</b> | <i>accA</i> | 1.9  | 9.7E-05 |
| SpyM3_1530        | <i>dnaJ</i> | 2.1  | 5.2E-08 |

|                   |               |      |         |
|-------------------|---------------|------|---------|
| SpyM3_1531        | <i>dnaK</i>   | 2.1  | 3.7E-09 |
| SpyM3_1532        | <i>grpE</i>   | 2.3  | 1.8E-11 |
| SpyM3_1533        | <i>hrcA</i>   | 2.0  | 8.5E-08 |
| SpyM3_1538        | -             | 1.7  | 1.1E-02 |
| SpyM3_1547        | -             | 1.9  | 2.2E-05 |
| <b>SpyM3_1566</b> | <i>pmi</i>    | -1.7 | 3.2E-02 |
| <b>SpyM3_1591</b> | -             | -2.1 | 1.8E-04 |
| SpyM3_1611        | <i>deoC</i>   | 2.5  | 2.1E-12 |
| SpyM3_1612        | <i>nupC</i>   | 1.9  | 1.7E-04 |
| SpyM3_1613        | <i>udp</i>    | 2.9  | 7.3E-17 |
| <b>SpyM3_1619</b> | -             | -1.8 | 8.2E-04 |
| SpyM3_1645        | <i>salR</i>   | -1.6 | 4.7E-02 |
| SpyM3_1658        | <i>lacB.2</i> | 1.6  | 2.4E-02 |
| <b>SpyM3_1666</b> | -             | 2.9  | 1.4E-02 |
| SpyM3_1694        | <i>pulA</i>   | -1.9 | 1.4E-03 |
| SpyM3_1696        | <i>msmK</i>   | 1.6  | 3.4E-02 |
| SpyM3_1700        | <i>dtd</i>    | 1.9  | 1.2E-04 |
| SpyM3_1701        | <i>relA</i>   | 1.7  | 1.0E-02 |
| SpyM3_1711        | -             | 2.8  | 6.0E-15 |
| SpyM3_1718        | <i>dppA</i>   | -1.8 | 7.4E-03 |
| SpyM3_1723        | -             | 1.7  | 7.8E-04 |
| SpyM3_1728        | <i>mga</i>    | -1.9 | 1.1E-04 |
| SpyM3_1734        | -             | 1.8  | 3.7E-03 |

|                   |              |      |          |
|-------------------|--------------|------|----------|
| SpyM3_1735        | -            | 2.8  | 9.3E-13  |
| SpyM3_1736        | -            | 2.8  | 4.0E-12  |
| <b>SpyM3_1737</b> | -            | 3.5  | 2.5E-25  |
| <b>SpyM3_1741</b> | -            | 2.0  | 8.3E-08  |
| <b>SpyM3_1742</b> | <i>speB</i>  | 1.6  | 1.1E-02  |
| SpyM3_1743        | -            | 1.6  | 4.9E-02  |
| SpyM3_1765        | <i>groEL</i> | 1.7  | 9.3E-04  |
| SpyM3_1766        | <i>groES</i> | 1.8  | 2.2E-04  |
| SpyM3_1784        | <i>pepO</i>  | -1.7 | 1.2E-02  |
| <b>SpyM3_1799</b> | <i>spxA2</i> | -3.8 | <1.0E-38 |
| <b>SpyM3_1843</b> | -            | -2.0 | 8.2E-04  |

134

135 <sup>1</sup> Locus tag as defined in the serotype M3 reference genome MGAS315. Bold font

136 indicates significant differential expression in both growth phases.

137 <sup>2</sup> *P*-value after Bonferonni correction

138
